# Supplementary material for: Mammalian Oocyte Analysis by MALDI MSI with Wet-Interface Matrix Deposition Technique
Source: MDPI journal article supplement (doi:10.3390/ma16041479), 2023-02-09

# Mammalian Oocyte Analysis by MALDI MSI with Wet-Interface Matrix Deposition Technique

Anna Bodzon-Kulakowska <sup>1</sup>, Wiesława Młodawska <sup>2</sup>, Przemysław Mielczarek <sup>3</sup>, Dorota Lachowicz <sup>4</sup>, Piotr Suder <sup>1</sup> and Marek Smoluch <sup>1,\*</sup>

<sup>1</sup> Department of Analytical Chemistry and Biochemistry, Faculty of Materials Science and Ceramics, AGH University of Science and Technology, A. Mickiewicza 30, 30-059 Krakow, Poland

<sup>2</sup> Department of Animal Reproduction, Anatomy and Genomics, University of Agriculture in Krakow, Al. Mickiewicza 24/28, 30-059 Krakow, Poland

<sup>3</sup> Laboratory of Proteomics and Mass Spectrometry, Maj Institute of Pharmacology, Polish Academy of Sciences, Smetna 12, 31-343 Krakow, Poland

<sup>4</sup> Academic Centre for Materials and Nanotechnology, AGH University of Science and Technology, A. Mickiewicza 30, 30-059 Krakow, Poland

\* Correspondence: smoluch@agh.edu.pl

## Supplementary materials:

### *Step-by-step preparation sequence of the figure 13 from the manuscript*

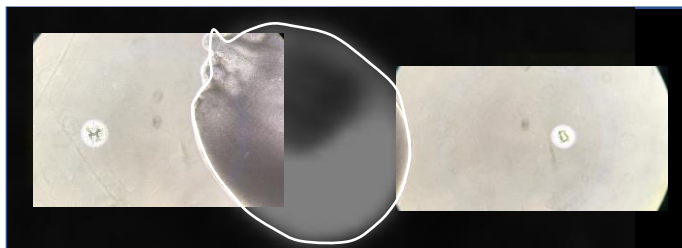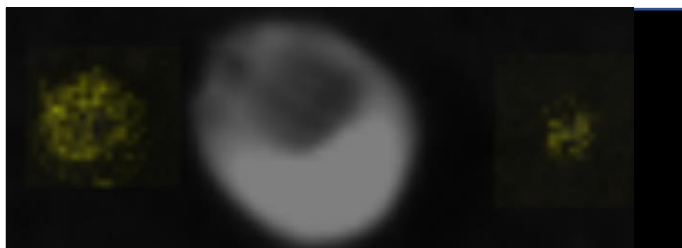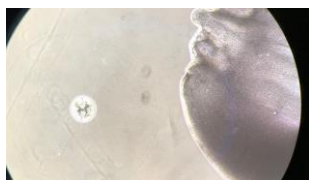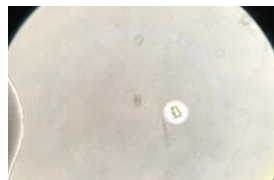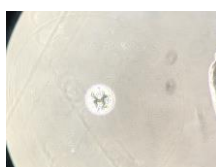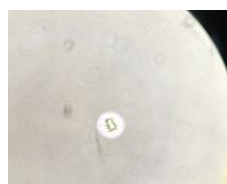

Original figure:

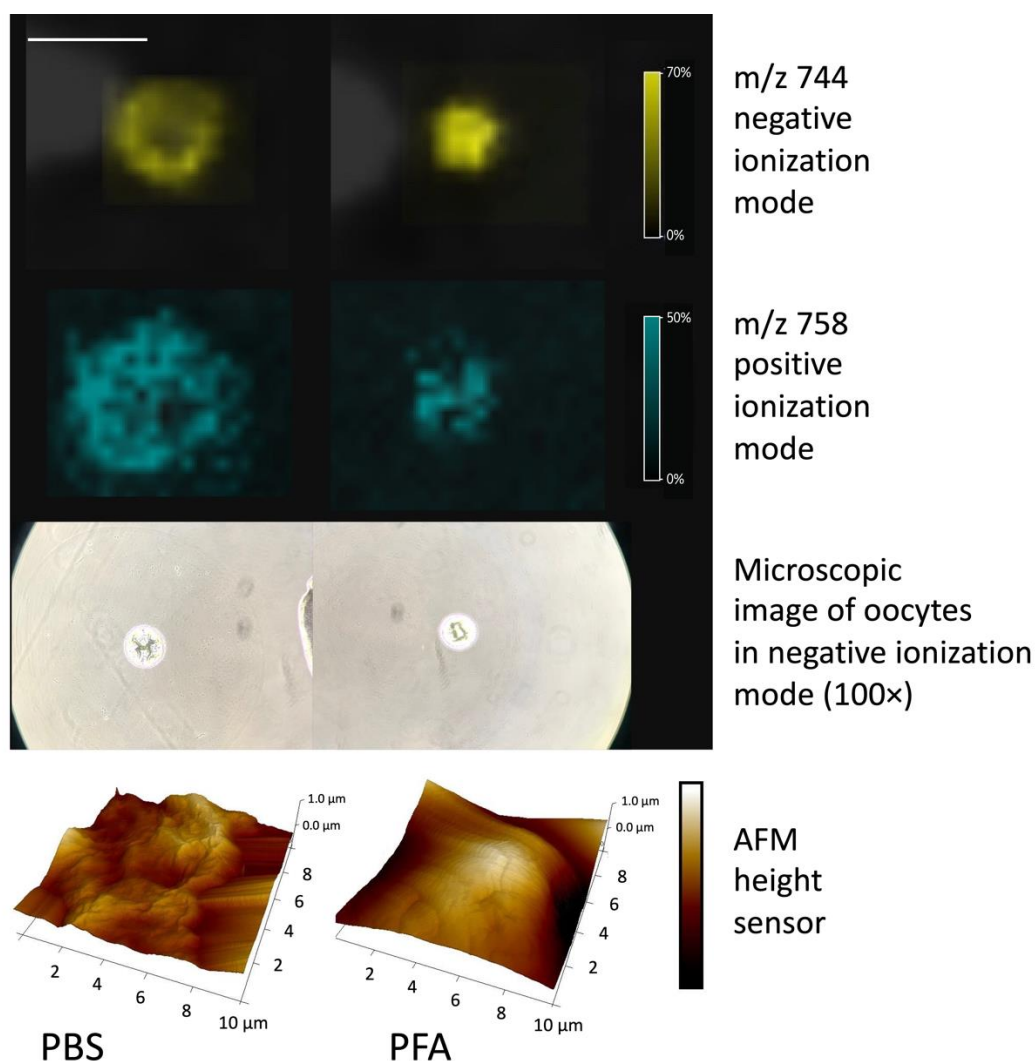

**Figure S1.** Oocyte washed with PBS (left) and the oocyte fixed with 4% PFA (right), negative and positive ionization mode, and AFM (Atomic Force Microscope) measurement of both types of the sample, size bar: 500 micrometers. Figure preparation.

Co-registered images of the cell with a few ion maps for the different m/z

Nozzle height: Z=15 mm, number of matrix layers: L=10

|                          |         |                                        |
|--------------------------|---------|----------------------------------------|
| Before matrix deposition | Imaging | After matrix deposition and MS imaging |
|--------------------------|---------|----------------------------------------|

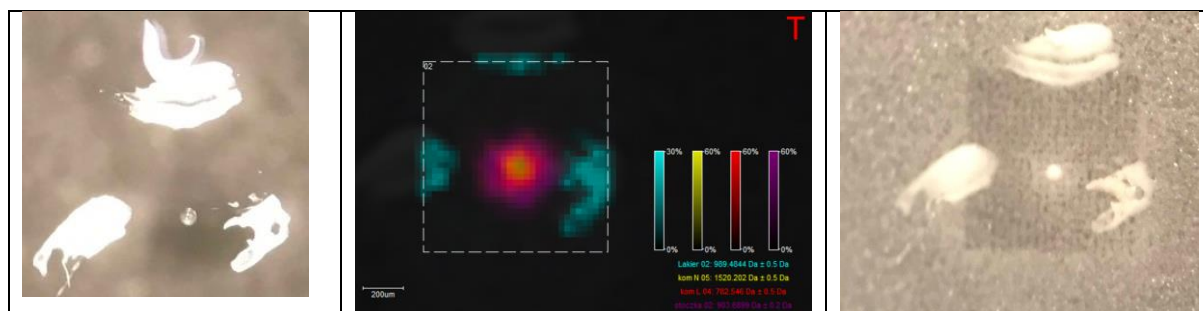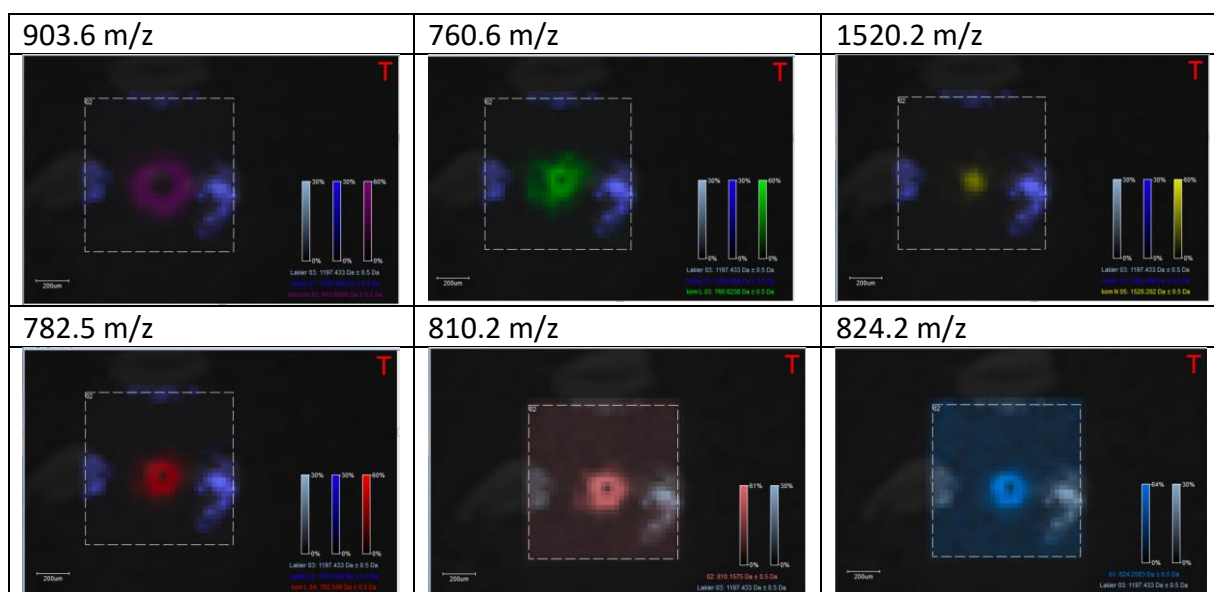

Nozzle height: Z=25 mm, number of matrix layers: L=10

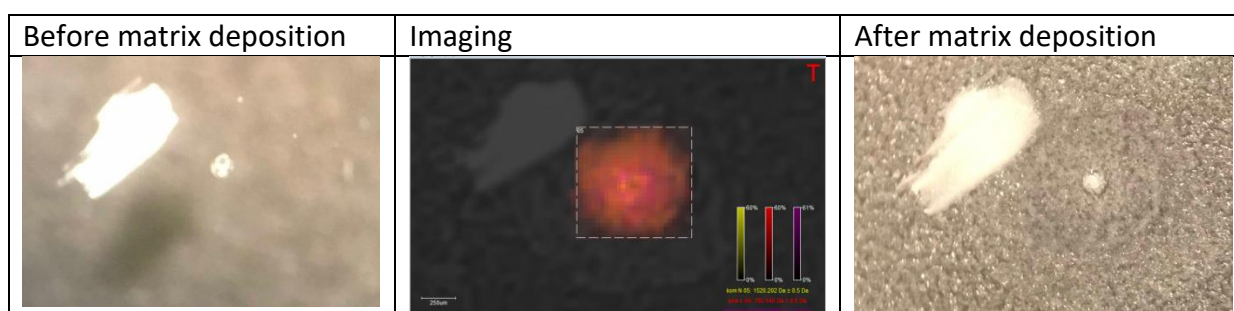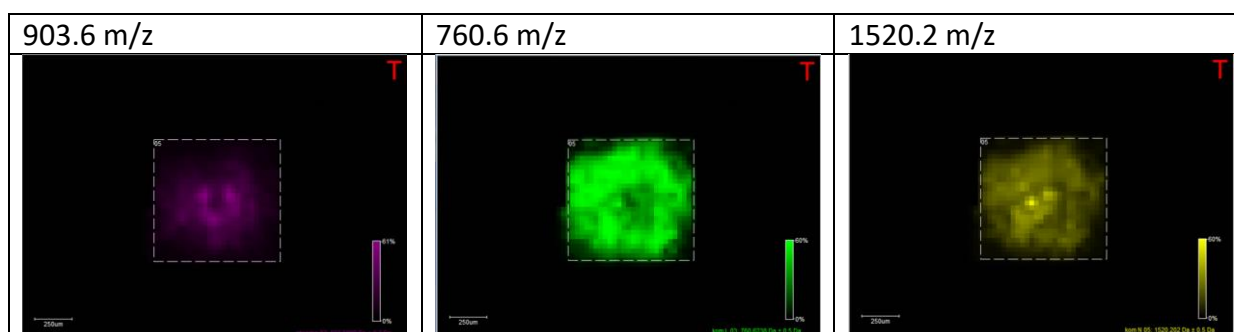

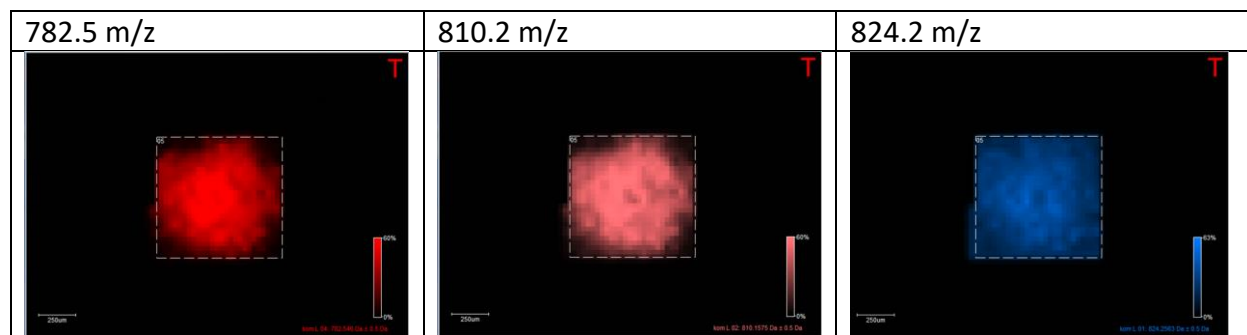

Supplement: s1 [file s1]
